# Supplementary material
Source: publisher site journal article supplement (https://www.dovepress.com/article/298729)
Supplement: Supplementary file 1 [file get_supplementary_file.php]

**Supplementary Table S1.** Genetic characteristics of *TP53*-mutated cohort (n=87)

| characteristics           | number | Percent (%) |
|---------------------------|--------|-------------|
| Mutation domain (protein) |        |             |
| TAD                       | 1      | 1.1         |
| PRD                       | 4      | 4.6         |
| DBD                       | 67     | 77.0        |
| NLS                       | 2      | 2.3         |
| TD                        | 7      | 8.0         |
| Others                    | 3      | 3.5         |
| Unknow                    | 3      | 3.5         |
| Mutation domain (gene)    |        |             |
| Exon2                     | 1      | 1.1         |
| Exon4                     | 13     | 14.9        |
| Exon5                     | 25     | 28.7        |
| Exon6                     | 11     | 12.7        |
| Exon7                     | 12     | 13.8        |
| Exon8                     | 12     | 13.8        |
| Exon9                     | 2      | 2.3         |
| Exon10                    | 8      | 9.2         |
| Introns                   | 3      | 3.5         |
| Mutation type             |        |             |
| Missense mutation         | 46     | 52.9        |
| Nonsense mutation         | 18     | 20.7        |
| Splice site mutation      | 3      | 3.4         |
| Frameshift mutation       | 16     | 18.4        |
| In-frame mutation         | 4      | 4.6         |

**Abbreviations:** PRD, proline-rich domain; DBD, DNA binding domain; TD, Tetramerization domain;
